# Supplementary material for: Cervical Cancer Cell Line Secretome Highlights the Roles of Transforming Growth Factor-Beta-Induced Protein ig-h3, Peroxiredoxin-2, and NRF2 on Cervical Carcinogenesis
Source: Hindawi journal article supplement (doi:10.1155/2017/4180703), 2017-01-01

## Supplementary Materials

Cervical cancer cell line secretome highlights the roles of transforming growth factor-beta-induced protein ig-h3, peroxiredoxin-2 and NRF2 on cervical carcinogenesis.

Georgia Kontostathi, Jerome Zoidakis, Manousos Makridakis, Vasiliki Lygirou, George Mermelekas, Theofilos Papadopoulos, Konstantinos Vougas, Alexios Vlamis-Gardikas, Peter Drakakis, Dimitrios Loutradis, Antonia Vlahou, Nicholas P. Anagnou, and Kalliopi I. Pappa

### Table Legends

**S1 Table.** Transition list of endogenous and heavy peptide as exported from skyline and imported in the acquisition method.

The mass ( $m/z$ ) in the first (Q1) and third quadrupole (Q3), the dwell time and the peptide sequence, as well as the charge state and the collision energy of the corresponding fragments are shown.

**S2 Table.** MRM quantification data. Light to heavy ratio of the peptide peak areas used for NRF2 protein quantification in each biological replicate.

**S3 Table.** Differentially expressed proteins in secretome analysis of SiHa vs HCK1T. Forty-five differentially expressed spots corresponding to 40 proteins in SiHa vs HCK1T comparison. The Mann-Whitney test was used for the statistical analysis. A  $p$  value  $<0.05$  (95% confidence levels) was considered statistically significant.

**S4 Table.** Differentially expressed proteins in secretome analysis of HeLa vs HCK1T. Forty-three differentially expressed spots corresponding to 44 proteins in HeLa vs HCK1T comparison. The Mann-Whitney test was used for the statistical analysis. A  $p$  value  $<0.05$  (95% confidence levels) was considered statistically significant.

**S5 Table.** Differentially expressed proteins in secretome analysis of C33A vs HCK1T. Fifty-three differentially expressed spots corresponding to 41 proteins in C33A vs HCK1T comparison. The Mann-Whitney test was used for the statistical analysis. A  $p$  value  $<0.05$  (95% confidence levels) was considered statistically significant.

**S6 Table.** Comparison of differentially expressed proteins in secretome analysis between individual comparisons in each cancer cell line vs HCK1T. Sixteen proteins are common in all comparisons.

**S7 Table.** Molecular function of differentially expressed proteins in secretome analysis. Predicted molecular function of differentially expressed proteins in all cancer cell lines vs HCK1T, by Panther Classification System (<http://www.pantherdb.org/>).

**S8 Table.** Differentially expressed proteins used in IPA. Sixty-seven differentially expressed proteins were used in IPA analysis after they were converted to gene names. Data were submitted to IPA as fold change values (ratios) calculated against the control group (HCK1T). The mean ratio was taken from all identified spots and only proteins with fold change  $>\pm 2$  were taken into account.

**S9 Table.** IPA results for transcription factors in cancer vs HCK1T secretome. IPA results showing the main transcription factors involved in regulation of the differentially expressed proteins in cancer vs normal.

**S10 Table.** Additional number of transcription factors that regulate NRF2 targets. The number of transcription regulators of NRF2 targets are listed.

---

**S1 Table: Transition list**

| <b>Q1 m/z</b> | <b>Q3 m/z</b> | <b>Dwell time (ms)</b> | <b>Protein</b> | <b>Peptide</b>              | <b>Fragment</b> | <b>Charge state</b> | <b>Collision Energy (eV)</b> |
|---------------|---------------|------------------------|----------------|-----------------------------|-----------------|---------------------|------------------------------|
| 701.368       | 858.439       | 20                     | NRF2           | LVETTMVPSPEAK<br>(+2) Light | y8              | +1                  | 35.7                         |
| 701.368       | 727.399       | 20                     | NRF2           | LVETTMVPSPEAK<br>(+2) Light | y7              | +1                  | 35.7                         |
| 701.368       | 628.330       | 20                     | NRF2           | LVETTMVPSPEAK<br>(+2) Light | y6              | +1                  | 35.7                         |
| 701.368       | 444.245       | 20                     | NRF2           | LVETTMVPSPEAK<br>(+2) Light | y4              | +1                  | 35.7                         |
| 701.368       | 314.669       | 20                     | NRF2           | LVETTMVPSPEAK<br>(+2) Light | y6              | +2                  | 35.7                         |

---

---

|         |         |    |      |               |    |    |      |
|---------|---------|----|------|---------------|----|----|------|
| 705.375 | 866.453 | 20 | NRF2 | LVETTMVPSPEAK | y8 | +1 | 35.7 |
|         |         |    |      | (+2) Heavy    |    |    |      |
| 705.375 | 735.413 | 20 | NRF2 | LVETTMVPSPEAK | y7 | +1 | 35.7 |
|         |         |    |      | (+2) Heavy    |    |    |      |
| 705.375 | 636.344 | 20 | NRF2 | LVETTMVPSPEAK | y6 | +1 | 35.7 |
|         |         |    |      | (+2) Heavy    |    |    |      |
| 705.375 | 452.260 | 20 | NRF2 | LVETTMVPSPEAK | y4 | +1 | 35.7 |
|         |         |    |      | (+2) Heavy    |    |    |      |
| 705.375 | 318.676 | 20 | NRF2 | LVETTMVPSPEAK | y6 | +2 | 35.7 |
|         |         |    |      | (+2) Heavy    |    |    |      |

---

---

**S2 Table: Quantification data**

| <b>Sample</b> | <b>L/H ratio</b> | <b>Sample</b>   | <b>L/H ratio</b> |
|---------------|------------------|-----------------|------------------|
| <b>SiHa 1</b> | 1.446            | <b>C33A 1</b>   | 1.418            |
| <b>SiHa 2</b> | 1.478            | <b>C33A 2</b>   | 1.277            |
| <b>SiHa 3</b> | 1.027            | <b>C33A 3</b>   | 1.987            |
| <b>HeLa 1</b> | 0.764            | <b>HCK1T 1</b>  | 0.960            |
| <b>HeLa 2</b> | 1.053            | <b>HCK1T 2</b>  | 0.843            |
| <b>HeLa 3</b> | 0.816            | <b>HCKT1T 3</b> | 0.839            |

---

**S3 Table: Differentially expressed proteins between SiHa vs HCK1T cells**

| Spot | Fold change (Ratio SiHa vs HCK1T) | Mean SiHa $\pm$ sd | Mean HCK1T $\pm$ sd | Protein name                                      | Entry name  | Mascot score | Sequence coverage(%) | Protein MW | p-value | p value |
|------|-----------------------------------|--------------------|---------------------|---------------------------------------------------|-------------|--------------|----------------------|------------|---------|---------|
| 1    | 3.89                              | 1600 $\pm$<br>2100 | 420 $\pm$<br>500    | Complement C1r subcomponent                       | C1R_HUMAN   | 81           | 32                   | 81606      | 5.8     | >0.05   |
| 2    | 4.59                              | 930 $\pm$<br>870   | 204 $\pm$<br>76     | Follistatin-related protein 4                     | FSTL4_HUMAN | 134          | 45                   | 94291      | 5.9     | >0.05   |
|      | 4.59                              | 930 $\pm$<br>870   | 204 $\pm$<br>76     | Neutral alpha-glucosidase AB                      | GANAB_HUMAN | 129          | 37                   | 107263     | 5.7     | >0.05   |
|      | 4.59                              | 930 $\pm$<br>870   | 204 $\pm$<br>76     | Procollagen-lysine,2-oxoglutarate 5-dioxygenase 2 | PLOD2_HUMAN | 108          | 41                   | 85373      | 6.3     | >0.05   |

|          |       |               |                 |                                         |             |     |    |       |     |       |
|----------|-------|---------------|-----------------|-----------------------------------------|-------------|-----|----|-------|-----|-------|
| <b>3</b> | 0.43  | 1600±<br>780  | 3600±<br>2200   | Glucosidase 2<br>subunit beta           | GLU2B_HUMAN | 81  | 34 | 60357 | 4.2 | >0.05 |
| <b>4</b> | 12.86 | 1010±<br>650  | 78±<br>140      | Complement C1r<br>subcomponent          | C1R_HUMAN   | 89  | 29 | 81606 | 5.8 | <0.05 |
| <b>5</b> | 12.2  | 870±<br>340   | 71±<br>64       | Gelsolin                                | GELS_HUMAN  | 93  | 31 | 86043 | 5.9 | <0.05 |
| <b>6</b> | 0.38  | 6300±<br>4000 | 16000±<br>17000 | 78 kDa glucose-<br>regulated protein    | GRP78_HUMAN | 282 | 51 | 72402 | 4.9 | >0.05 |
| <b>7</b> | 3.12  | 2980±<br>860  | 950±<br>1400    | Heat shock<br>cognate 71 kDa<br>protein | HSP7C_HUMAN | 184 | 45 | 71082 | 5.2 | >0.05 |



---

|           |       |               |             |                                                        |             |     |    |       |     |       |
|-----------|-------|---------------|-------------|--------------------------------------------------------|-------------|-----|----|-------|-----|-------|
| <b>8</b>  | 3.85  | 1800±<br>570  | 460±<br>350 | Heat shock 70<br>kDa protein<br>1A/1B                  | HSP71_HUMAN | 195 | 59 | 70294 | 5.4 | <0.05 |
|           | 3.85  | 1800±<br>570  | 460±<br>350 | Tripeptidyl-<br>peptidase 1                            | TPP1_HUMAN  | 68  | 40 | 61723 | 6   | <0.05 |
| <b>9</b>  | 32.95 | 4200±<br>2000 | 130±<br>110 | Proprotein<br>convertase<br>subtilisin/kexin<br>type 9 | PCSK9_HUMAN | 157 | 26 | 75722 | 6.1 | <0.05 |
| <b>10</b> | 4.29  | 1700±<br>300  | 390±<br>180 | Proprotein<br>convertase<br>subtilisin/kexin<br>type 9 | PCSK9_HUMAN | 104 | 77 | 75722 | 6.1 | <0.05 |

---

|           |       |               |               |                                    |             |     |    |       |     |       |
|-----------|-------|---------------|---------------|------------------------------------|-------------|-----|----|-------|-----|-------|
| <b>11</b> | 0.47  | 3070±<br>1300 | 6500±<br>5800 | Protein disulfide-<br>isomerase    | PDIA1_HUMAN | 256 | 61 | 57480 | 4.6 | >0.05 |
| <b>12</b> | 16.41 | 8300±<br>3200 | 510±<br>240   | Nucleobindin-1                     | NUCB1_HUMAN | 275 | 60 | 53846 | 5   | <0.05 |
| <b>13</b> | 0.17  | 1100±<br>400  | 6400±<br>2300 | Protein disulfide-<br>isomerase A3 | PDIA3_HUMAN | 145 | 46 | 57146 | 5.9 | >0.05 |
| <b>14</b> | 0.28  | 1400±<br>200  | 5000±<br>4900 | Protein disulfide-<br>isomerase A3 | PDIA3_HUMAN | 209 | 55 | 57146 | 5.9 | >0.05 |
| <b>15</b> | 6.20  | 690±<br>470   | 110±<br>76    | Keratin, type II<br>cytoskeletal 1 | K2C1_HUMAN  | 69  | 24 | 66170 | 8.8 | >0.05 |

---

|           |       |                 |                 |                                   |            |     |    |       |     |       |
|-----------|-------|-----------------|-----------------|-----------------------------------|------------|-----|----|-------|-----|-------|
| <b>16</b> | 2.30  | 1500±<br>1400   | 640±<br>240     | Pyruvate kinase<br>isozymes M1/M2 | KPYM_HUMAN | 216 | 48 | 58470 | 9   | >0.05 |
| <b>17</b> | 0.46  | 1300±<br>170    | 2700±<br>900    | Pyruvate kinase<br>isozymes M1/M2 | KPYM_HUMAN | 205 | 52 | 58470 | 9   | <0.05 |
| <b>18</b> | 0.07  | 3100±<br>1400   | 41000±<br>20200 | Calreticulin                      | CALR_HUMAN | 202 | 60 | 48283 | 4.1 | <0.05 |
| <b>19</b> | 10.08 | 21000±<br>12000 | 2100±<br>1300   | Carboxypeptidase<br>E             | CBPE_HUMAN | 190 | 46 | 53516 | 4.9 | <0.05 |

---

|           |       |                |                 |                         |            |     |    |       |     |       |
|-----------|-------|----------------|-----------------|-------------------------|------------|-----|----|-------|-----|-------|
| <b>20</b> | 6.66  | 2300±<br>2000  | 340±<br>300     | Cathepsin D             | CATD_HUMAN | 116 | 44 | 45037 | 6.1 | >0.05 |
| <b>21</b> | 20.39 | 6300±<br>390   | 310±<br>170     | Cathepsin D             | CATD_HUMAN | 201 | 53 | 45037 | 6.1 | <0.05 |
| <b>22</b> | 5.85  | 3600±<br>2600  | 620±<br>600     | Cathepsin D             | CATD_HUMAN | 77  | 42 | 45037 | 6.1 | <0.05 |
| <b>23</b> | 0.27  | 4900±<br>3400  | 19000±<br>9200  | Alpha-enolase           | ENOA_HUMAN | 289 | 75 | 47481 | 7.7 | <0.05 |
| <b>24</b> | 0.28  | 11000±<br>4100 | 40000±<br>22000 | Actin, cytoplasmic<br>2 | ACTG_HUMAN | 178 | 68 | 42108 | 5.2 | >0.05 |
|           | 0.28  | 11000±<br>4060 | 40000±<br>22000 | Actin, cytoplasmic<br>1 | ACTB_HUMAN | 166 | 63 | 42052 | 5.2 | >0.05 |

---

|           |       |               |                |                                         |             |     |    |       |     |       |
|-----------|-------|---------------|----------------|-----------------------------------------|-------------|-----|----|-------|-----|-------|
| <b>25</b> | 0.34  | 2300±<br>440  | 6900±<br>3000  | Serpin B5                               | SPB5_HUMAN  | 93  | 60 | 42530 | 5.7 | <0.05 |
| <b>26</b> | 0.35  | 1200±<br>690  | 3600±<br>1600  | Serpin B5                               | SPB5_HUMAN  | 124 | 59 | 42530 | 5.7 | >0.05 |
| <b>27</b> | 0.23  | 420±<br>390   | 1800±<br>820   | Cathepsin B                             | CATB_HUMAN  | 69  | 39 | 38766 | 5.9 | >0.05 |
| <b>28</b> | 0.22  | 2200±<br>360  | 10200±<br>3100 | Fructose-<br>bisphosphate<br>aldolase A | ALDOA_HUMAN | 226 | 73 | 39851 | 9.2 | <0.05 |
| <b>29</b> | 11.58 | 2300±<br>2900 | 200±<br>160    | Keratin, type I<br>cytoskeletal 10      | K1C10_HUMAN | 79  | 29 | 59020 | 5   | >0.05 |

---

---

|           |       |                |                |                                                                   |             |    |    |       |     |       |
|-----------|-------|----------------|----------------|-------------------------------------------------------------------|-------------|----|----|-------|-----|-------|
| <b>30</b> | 9.79  | 930±<br>230    | 100±<br>130    | HLA class I<br>histocompatibility<br>antigen, A-24<br>alpha chain | 1A24_HUMAN  | 90 | 50 | 40948 | 5.9 | <0.05 |
| <b>31</b> | 0.45  | 5100±<br>1600  | 11000±<br>7800 | Glyceraldehyde-<br>3-phosphate<br>dehydrogenase                   | G3P_HUMAN   | 62 | 41 | 36201 | 9.3 | >0.05 |
| <b>32</b> | 3.12  | 880±<br>460    | 280±<br>260    | Metalloproteinase<br>inhibitor 1                                  | TIMP1_HUMAN | 55 | 53 | 23840 | 9.8 | >0.05 |
| <b>33</b> | 33.38 | 12000±<br>5300 | 360±<br>310    | Phosphoglycerate<br>mutase 1                                      | PGAM1_HUMAN | 99 | 45 | 28900 | 6.8 | <0.05 |
|           | 33.38 | 12000±<br>5300 | 360±<br>310    | Metalloproteinase<br>inhibitor 1                                  | TIMP1_HUMAN | 75 | 45 | 23840 | 9.8 | <0.05 |
| <b>34</b> | 13.26 | 11000±<br>2400 | 830±<br>480    | Metalloproteinase<br>inhibitor 1                                  | TIMP1_HUMAN | 95 | 54 | 23840 | 9.8 | <0.05 |

---

---

|           |      |              |                |                                         |             |     |    |       |     |       |
|-----------|------|--------------|----------------|-----------------------------------------|-------------|-----|----|-------|-----|-------|
| <b>35</b> | 0.01 | 66±<br>82    | 12000±<br>3000 | 14-3-3 protein<br>sigma                 | 1433S_HUMAN | 105 | 65 | 27871 | 4.5 | <0.05 |
| <b>36</b> | 0.15 | 310±<br>390  | 2000±<br>960   | Rho GDP-<br>dissociation<br>inhibitor 1 | GDIR1_HUMAN | 116 | 44 | 23250 | 4.9 | >0.05 |
| <b>37</b> | 0.05 | 280±<br>170  | 5300±<br>1700  | Heat shock<br>protein beta-1            | HSPB1_HUMAN | 145 | 71 | 22826 | 6   | <0.05 |
| <b>38</b> | 0.29 | 670±<br>350  | 2300±<br>1200  | Phosphoglycerate<br>mutase 1            | PGAM1_HUMAN | 131 | 73 | 28900 | 6.8 | >0.05 |
| <b>39</b> | 0.21 | 1200±<br>920 | 5500±<br>2000  | Triosephosphate<br>isomerase            | TPIS_HUMAN  | 118 | 69 | 31057 | 5.6 | <0.05 |
| <b>40</b> | 0.26 | 890±<br>320  | 3500±<br>1600  | Glutathione S-<br>transferase P         | GSTP1_HUMAN | 137 | 69 | 23569 | 5.3 | <0.05 |

---

---

|           |       |               |               |                                                |             |     |    |       |     |       |
|-----------|-------|---------------|---------------|------------------------------------------------|-------------|-----|----|-------|-----|-------|
| <b>41</b> | 10.62 | 9600±<br>2300 | 900±<br>510   | Metalloproteinase<br>inhibitor 2               | TIMP2_HUMAN | 106 | 51 | 25067 | 8.8 | <0.05 |
| <b>42</b> | 0.16  | 220±<br>110   | 1400±<br>540  | Superoxide<br>dismutase [Mn],<br>mitochondrial | SODM_HUMAN  | 53  | 40 | 24878 | 9.1 | <0.05 |
| <b>43</b> | 0.45  | 1500±<br>810  | 3200±<br>1100 | Transgelin-2                                   | TAGL2_HUMAN | 94  | 62 | 22548 | 9.3 | <0.05 |
| <b>44</b> | 21.56 | 1700±<br>1100 | 78±<br>88     | Epididymal<br>secretory protein<br>E1          | NPC2_HUMAN  | 77  | 50 | 16902 | 9   | >0.05 |
| <b>45</b> | 2.47  | 2200±<br>620  | 890±<br>510   | Peptidyl-prolyl<br>cis-trans<br>isomerase A    | PPIA_HUMAN  | 78  | 53 | 18229 | 9   | >0.05 |

---



**S4 Table: Differentially expressed proteins between HeLa vs HCK1T cells**

| Spot | Fold change (Ratio HeLa vs HCK1T) | Mean HeLa $\pm$ sd | Mean HCK1T $\pm$ sd | Protein name                                       | Entry name  | Mascot score | Sequence coverage | Protein MW | p-value | $\rho$ value |
|------|-----------------------------------|--------------------|---------------------|----------------------------------------------------|-------------|--------------|-------------------|------------|---------|--------------|
| 1    | 11.2                              | 2300 $\pm$<br>1100 | 204 $\pm$<br>76     | Follistatin-related protein 4                      | FSTL4_HUMAN | 134          | 45                | 94291      | 5.9     | <0.05        |
|      | 11.2                              | 2300 $\pm$<br>1100 | 204 $\pm$<br>76     | Neutral alpha-glucosidase AB                       | GANAB_HUMAN | 129          | 37                | 107263     | 5.7     | <0.05        |
|      | 11.2                              | 2300 $\pm$<br>1100 | 204 $\pm$<br>76     | Procollagen-lysine, 2-oxoglutarate 5-dioxygenase 2 | PLOD2_HUMAN | 108          | 41                | 85373      | 6.3     | <0.05        |
| 2    | 0.23                              | 820 $\pm$<br>1100  | 3600 $\pm$<br>2200  | Glucosidase 2 subunit beta                         | GLU2B_HUMAN | 81           | 34                | 60357      | 4.2     | >0.05        |

---

|          |       |               |                 |                                       |             |     |    |        |     |       |
|----------|-------|---------------|-----------------|---------------------------------------|-------------|-----|----|--------|-----|-------|
| <b>3</b> | 0.4   | 1200±<br>430  | 3100±<br>1100   | Laminin subunit<br>gamma-2            | LAMC2_HUMAN | 192 | 25 | 134769 | 5.8 | >0.05 |
| <b>4</b> | 11.14 | 3200±<br>1000 | 290±<br>320     | Heat shock<br>protein HSP 90-<br>beta | HS90B_HUMAN | 95  | 35 | 83554  | 4.8 | <0.05 |
| <b>5</b> | 3.11  | 240±<br>220   | 80±<br>140      | Complement C1r<br>subcomponent        | C1R_HUMAN   | 89  | 29 | 81606  | 5.8 | >0.05 |
| <b>6</b> | 2.92  | 210±<br>180   | 71±<br>64       | Gelsolin                              | GELS_HUMAN  | 93  | 31 | 86043  | 5.9 | >0.05 |
| <b>7</b> | 0.39  | 6400±<br>1400 | 16000±<br>17000 | 78 kDa glucose-<br>regulated protein  | GRP78_HUMAN | 282 | 51 | 72402  | 4.9 | >0.05 |

---

|           |       |               |              |                                                        |             |     |    |       |     |       |
|-----------|-------|---------------|--------------|--------------------------------------------------------|-------------|-----|----|-------|-----|-------|
| <b>8</b>  | 2.81  | 2700±<br>2400 | 950±<br>1400 | Heat shock<br>cognate 71 kDa<br>protein                | HSP7C_HUMAN | 184 | 45 | 71082 | 5.2 | >0.05 |
| <b>9</b>  | 6.25  | 2900±<br>680  | 460±<br>350  | Heat shock 70<br>kDa protein<br>1A/1B                  | HSP71_HUMAN | 195 | 59 | 70294 | 5.4 | <0.05 |
|           | 6.25  | 2900±<br>680  | 460±<br>350  | Tripeptidyl-<br>peptidase 1                            | TPP1_HUMAN  | 68  | 40 | 61723 | 6   | <0.05 |
| <b>10</b> | 45.34 | 5800±<br>2000 | 128±<br>110  | Proprotein<br>convertase<br>subtilisin/kexin<br>type 9 | PCSK9_HUMAN | 157 | 26 | 75722 | 6.1 | <0.05 |
| <b>11</b> | 8.03  | 3200±<br>990  | 390±<br>180  | Proprotein<br>convertase<br>subtilisin/kexin<br>type 9 | PCSK9_HUMAN | 104 | 77 | 75722 | 6.1 | <0.05 |

|           |       |               |             |                                                       |             |     |    |       |     |       |
|-----------|-------|---------------|-------------|-------------------------------------------------------|-------------|-----|----|-------|-----|-------|
| <b>12</b> | 7.23  | 3600±<br>810  | 500±<br>80  | Stress-induced-phosphoprotein 1                       | STIP1_HUMAN | 141 | 56 | 63227 | 6.4 | <0.05 |
| <b>13</b> | 45.15 | 5100±<br>5100 | 110±<br>170 | Transforming growth factor-beta-induced protein ig-h3 | BGH3_HUMAN  | 99  | 37 | 75261 | 8.6 | <0.05 |
| <b>14</b> | 7.86  | 3300±<br>190  | 420±<br>250 | Transketolase                                         | TKT_HUMAN   | 126 | 47 | 68519 | 8.5 | <0.05 |
| <b>15</b> | 10.26 | 2600±<br>820  | 260±<br>210 | Transketolase                                         | TKT_HUMAN   | 85  | 35 | 68519 | 8.5 | <0.05 |
| <b>16</b> | 5.51  | 2800±<br>1100 | 510±<br>240 | Nucleobindin-1                                        | NUCB1_HUMAN | 275 | 60 | 53846 | 5   | <0.05 |
| <b>17</b> | 2.21  | 1200±<br>860  | 540±<br>630 | Dipeptidyl peptidase 2                                | DPP2_HUMAN  | 53  | 19 | 54763 | 5.9 | >0.05 |

---

|           |      |               |                 |                                      |             |     |    |       |     |       |
|-----------|------|---------------|-----------------|--------------------------------------|-------------|-----|----|-------|-----|-------|
| <b>18</b> | 3.39 | 970±<br>870   | 290±<br>380     | T-complex protein<br>1 subunit theta | TCPQ_HUMAN  | 152 | 48 | 60153 | 5.3 | >0.05 |
| <b>19</b> | 5.93 | 660±<br>320   | 110±<br>76      | Keratin, type II<br>cytoskeletal 1   | K2C1_HUMAN  | 134 | 24 | 66170 | 8.8 | >0.05 |
| <b>20</b> | 3.96 | 2500±<br>2100 | 640±<br>240     | Pyruvate kinase<br>isozymes M1/M2    | KPYM_HUMAN  | 216 | 48 | 58470 | 9   | <0.05 |
| <b>21</b> | 0.24 | 1600±<br>810  | 6500±<br>5800   | Protein disulfide-<br>isomerase      | PDIA1_HUMAN | 256 | 61 | 57480 | 4.6 | >0.05 |
| <b>22</b> | 0.23 | 9400±<br>3700 | 41000±<br>20000 | Calreticulin                         | CALR_HUMAN  | 202 | 60 | 48283 | 4.1 | <0.05 |

---

|           |       |               |               |                                                |             |     |    |       |     |       |
|-----------|-------|---------------|---------------|------------------------------------------------|-------------|-----|----|-------|-----|-------|
| <b>23</b> | 4.71  | 9700±<br>4600 | 2050±<br>1300 | Carboxypeptidase<br>E                          | CBPE_HUMAN  | 190 | 46 | 53516 | 4.9 | <0.05 |
| <b>24</b> | 0.25  | 750±<br>970   | 3100±<br>1700 | Protein disulfide-<br>isomerase A6             | PDIA6_HUMAN | 118 | 46 | 48490 | 4.8 | >0.05 |
|           | 0.25  | 750±<br>970   | 3100±<br>1700 | ATP synthase<br>subunit beta,<br>mitochondrial | ATPB_HUMAN  | 72  | 34 | 56525 | 5.1 | >0.05 |
| <b>25</b> | 2.54  | 1300±<br>310  | 510±<br>200   | Fascin                                         | FSCN1_HUMAN | 184 | 55 | 55123 | 7   | <0.05 |
| <b>26</b> | 11.24 | 3800±<br>2800 | 340±<br>300   | Cathepsin D                                    | CATD_HUMAN  | 116 | 44 | 45037 | 6.1 | <0.05 |

---

|           |      |               |                 |                         |            |     |    |       |     |       |
|-----------|------|---------------|-----------------|-------------------------|------------|-----|----|-------|-----|-------|
| <b>27</b> | 9.79 | 3030±<br>94   | 310±<br>170     | Cathepsin D             | CATD_HUMAN | 201 | 53 | 45037 | 6.1 | <0.05 |
| <b>28</b> | 9.35 | 5800±<br>2100 | 620±<br>600     | Cathepsin D             | CATD_HUMAN | 77  | 42 | 45037 | 6.1 | >0.05 |
| <b>29</b> | 0.34 | 6400±<br>4400 | 19000±<br>9200  | Alpha-enolase           | ENOA_HUMAN | 289 | 75 | 47481 | 7.7 | >0.05 |
| <b>30</b> | 0.20 | 8100±<br>1500 | 40000±<br>22000 | Actin, cytoplasmic<br>2 | ACTG_HUMAN | 178 | 68 | 42108 | 5.2 | >0.05 |
|           | 0.20 | 8100±<br>1500 | 40000±<br>22000 | Actin, cytoplasmic<br>1 | ACTB_HUMAN | 166 | 63 | 42052 | 5.2 | >0.05 |

---

---

|           |       |               |                |                                                          |             |     |    |       |     |       |
|-----------|-------|---------------|----------------|----------------------------------------------------------|-------------|-----|----|-------|-----|-------|
| <b>31</b> | 2.21  | 8200±<br>3700 | 3700±<br>2500  | Cathepsin Z                                              | CATZ_HUMAN  | 59  | 44 | 34530 | 6.9 | >0.05 |
| <b>32</b> | 2.37  | 1600±<br>460  | 660±<br>140    | Phosphoglycerate kinase 1                                | PGK1_HUMAN  | 81  | 40 | 44985 | 9.2 | >0.05 |
| <b>33</b> | 48.84 | 9600±<br>3500 | 200±<br>150    | Keratin, type I cytoskeletal 10                          | K1C10_HUMAN | 79  | 29 | 59020 | 5   | >0.05 |
| <b>34</b> | 0.29  | 3000±<br>2500 | 10000±<br>3100 | Fructose-bisphosphate aldolase A                         | ALDOA_HUMAN | 226 | 73 | 39851 | 9.2 | <0.05 |
| <b>35</b> | 15.53 | 1500±<br>160  | 100±<br>130    | HLA class I histocompatibility antigen, A-24 alpha chain | 1A24_HUMAN  | 90  | 50 | 40948 | 5.9 | >0.05 |

---



---

|           |      |               |               |                                                     |             |     |    |              |     |       |
|-----------|------|---------------|---------------|-----------------------------------------------------|-------------|-----|----|--------------|-----|-------|
| <b>36</b> | 4.12 | 4500±<br>1700 | 1100±<br>850  | Heterogeneous<br>nuclear<br>ribonucleoprotein<br>A1 | ROA1_HUMAN  | 114 | 43 | 38837.<br>00 | 9.6 | <0.05 |
| <b>37</b> | 2.57 | 920±<br>250   | 360±<br>310   | Phosphoglycerate<br>mutase 1                        | PGAM1_HUMAN | 99  | 45 | 28900        | 6.8 | <0.05 |
|           | 2.57 | 920±<br>250   | 360±<br>3000  | Metalloproteinase<br>inhibitor 1                    | TIMP1_HUMAN | 75  | 45 | 23840        | 9.8 | <0.05 |
| <b>38</b> | 0.20 | 310±<br>330   | 1500±<br>700  | Keratin, type I<br>cytoskeletal 10                  | K1C10_HUMAN | 95  | 43 | 59020        | 5   | <0.05 |
| <b>39</b> | 0.11 | 560±<br>310   | 5300±<br>1700 | Heat shock<br>protein beta-1                        | HSPB1_HUMAN | 145 | 71 | 22826        | 6   | <0.05 |

---

---

|           |      |               |               |                                             |             |     |    |       |     |       |
|-----------|------|---------------|---------------|---------------------------------------------|-------------|-----|----|-------|-----|-------|
| <b>40</b> | 0.23 | 1300±<br>1100 | 5500±<br>2000 | Triosephosphate<br>isomerase                | TPIS_HUMAN  | 143 | 69 | 31057 | 5.6 | <0.05 |
| <b>41</b> | 0.11 | 90±<br>84     | 830±<br>310   | Protein DJ-1                                | PARK7_HUMAN | 114 | 83 | 20050 | 6.4 | <0.05 |
| <b>42</b> | 8.04 | 7300±<br>1900 | 900±<br>510   | Metalloproteinase<br>inhibitor 2            | TIMP2_HUMAN | 106 | 51 | 25067 | 8.8 | <0.05 |
| <b>43</b> | 0.37 | 2600±<br>1600 | 7200±<br>1400 | Peptidyl-prolyl<br>cis-trans<br>isomerase A | PPIA_HUMAN  | 116 | 70 | 18229 | 9   | >0.05 |

---

**S5 Table: Differentially expressed proteins between C33A vs HCK1T cells**

| <b>Spot</b> | <b>Fold change (Ratio C33A vs HCK1T)</b> | <b>Mean C33A±sd</b> | <b>Mean HCK1T±sd</b> | <b>Protein name</b> | <b>Entry name</b> | <b>Mascot score</b> | <b>Sequence coverage</b> | <b>Protein MW</b> | <b>p-value</b> | <b>p-value</b> |
|-------------|------------------------------------------|---------------------|----------------------|---------------------|-------------------|---------------------|--------------------------|-------------------|----------------|----------------|
| <b>1</b>    | 0.16                                     | 68±<br>59           | 430±<br>180          | Fibronectin         | FINC_HUMAN        | 147                 | 21                       | 266052            | 5.4            | >0.05          |
| <b>2</b>    | 0.30                                     | 180±<br>190         | 590±<br>390          | Fibronectin         | FINC_HUMAN        | 257                 | 34                       | 266052            | 5.4            | >0.05          |
| <b>3</b>    | 0.21                                     | 130±<br>62          | 610±<br>400          | Fibronectin         | FINC_HUMAN        | 93                  | 22                       | 266052            | 5.4            | <0.05          |
| <b>4</b>    | 0.10                                     | 46±<br>24           | 460±<br>540          | Fibronectin         | FINC_HUMAN        | 367                 | 40                       | 266052            | 5.4            | <0.05          |

|           |      |               |               |                                |             |     |    |        |     |       |
|-----------|------|---------------|---------------|--------------------------------|-------------|-----|----|--------|-----|-------|
| <b>5</b>  | 0.23 | 110±<br>83    | 490±<br>490   | Fibronectin                    | FINC_HUMAN  | 239 | 32 | 266052 | 5.4 | >0.05 |
| <b>6</b>  | 0.23 | 220±<br>220   | 970±<br>660   | Fibronectin                    | FINC_HUMAN  | 274 | 34 | 266052 | 5.4 | >0.05 |
| <b>7</b>  | 0.25 | 200±<br>98    | 810±<br>490   | Fibronectin                    | FINC_HUMAN  | 328 | 33 | 266052 | 5.4 | >0.05 |
| <b>8</b>  | 0.35 | 370±<br>180   | 1060±<br>1000 | Fibronectin                    | FINC_HUMAN  | 165 | 26 | 266052 | 5.4 | >0.05 |
| <b>9</b>  | 5.15 | 2800±<br>2800 | 540±<br>610   | Heat shock 70<br>kDa protein 4 | HSP74_HUMAN | 129 | 49 | 95127  | 5   | >0.05 |
| <b>10</b> | 0.40 | 1400±<br>380  | 3600±<br>2200 | Glucosidase 2<br>subunit beta  | GLU2B_HUMAN | 81  | 34 | 60357  | 4.2 | >0.05 |

---

|           |       |               |                 |                                                    |             |     |    |        |     |       |
|-----------|-------|---------------|-----------------|----------------------------------------------------|-------------|-----|----|--------|-----|-------|
| <b>11</b> | 0.47  | 1400±<br>790  | 3050±<br>1100   | Laminin<br>subunit<br>gamma-2                      | LAMC2_HUMAN | 192 | 25 | 134769 | 5.8 | >0.05 |
| <b>12</b> | 2.21  | 2700±<br>1200 | 1200±<br>370    | Transitional<br>endoplasmic<br>reticulum<br>ATPase | TERA_HUMAN  | 162 | 49 | 89950  | 5   | <0.05 |
| <b>13</b> | 16.22 | 4700±<br>1300 | 290±<br>320     | Heat shock<br>protein HSP<br>90-beta               | HS90B_HUMAN | 95  | 35 | 83554  | 4.8 | <0.05 |
| <b>14</b> | 0.23  | 3700±<br>1960 | 16400±<br>17000 | 78 kDa<br>glucose-<br>regulated<br>protein         | GRP78_HUMAN | 282 | 51 | 72402  | 4.9 | >0.05 |
| <b>15</b> | 4.53  | 4300±<br>950  | 950±<br>1400    | Heat shock<br>cognate 71<br>kDa protein            | HSP7C_HUMAN | 184 | 45 | 71082  | 5.2 | >0.05 |

---

---

|           |      |               |             |                                                        |             |     |    |       |     |       |
|-----------|------|---------------|-------------|--------------------------------------------------------|-------------|-----|----|-------|-----|-------|
| <b>16</b> | 6.44 | 2970±<br>510  | 460±<br>350 | Heat shock 70<br>kDa protein<br>1A/1B                  | HSP71_HUMAN | 195 | 59 | 70294 | 5.4 | >0.05 |
|           | 6.44 | 2970±<br>510  | 460±<br>350 | Tripeptidyl-<br>peptidase 1                            | TPP1_HUMAN  | 68  | 40 | 61723 | 6   | >0.05 |
| <b>17</b> | 9    | 1200±<br>1040 | 128±<br>105 | Proprotein<br>convertase<br>subtilisin/kexin<br>type 9 | PCSK9_HUMAN | 157 | 26 | 75722 | 6.1 | >0.05 |
| <b>18</b> | 3.01 | 1200±<br>1100 | 390±<br>180 | Proprotein<br>convertase<br>subtilisin/kexin<br>type 9 | PCSK9_HUMAN | 104 | 77 | 75722 | 6.1 | >0.05 |
| <b>19</b> | 6.74 | 3400±<br>830  | 500±<br>80  | Stress-<br>induced-<br>phospho-<br>protein 1           | STIP1_HUMAN | 141 | 56 | 63227 | 6.4 | <0.05 |

---

|           |       |               |                 |                                         |             |     |    |       |     |       |
|-----------|-------|---------------|-----------------|-----------------------------------------|-------------|-----|----|-------|-----|-------|
| <b>20</b> | 2.09  | 880±<br>610   | 420±<br>250     | Transketolase                           | TKT_HUMAN   | 126 | 47 | 68519 | 8.5 | >0.05 |
| <b>21</b> | 5.74  | 1500±<br>1100 | 260±<br>210     | Transketolase                           | TKT_HUMAN   | 85  | 35 | 68519 | 8.5 | >0.05 |
| <b>22</b> | 15.69 | 7900±<br>3200 | 505±<br>240     | Nucleobindin-<br>1                      | NUCB1_HUMAN | 275 | 60 | 53846 | 5   | <0.05 |
| <b>23</b> | 9.67  | 2800±<br>920  | 290±<br>380     | T-complex<br>protein 1<br>subunit theta | TCPQ_HUMAN  | 152 | 48 | 60153 | 5.3 | <0.05 |
| <b>24</b> | 2.17  | 1400±<br>1100 | 640±<br>240     | Pyruvate<br>kinase<br>isozymes<br>M1/M2 | KPYM_HUMAN  | 216 | 48 | 58470 | 9   | >0.05 |
| <b>25</b> | 0.07  | 2900±<br>1700 | 41300±<br>20200 | Calreticulin                            | CALR_HUMAN  | 202 | 60 | 48283 | 4.1 | <0.05 |

---

|           |       |                |               |                                       |             |     |    |       |     |       |
|-----------|-------|----------------|---------------|---------------------------------------|-------------|-----|----|-------|-----|-------|
| <b>26</b> | 0.27  | 1800±<br>540   | 6500±<br>5800 | Protein<br>disulfide-<br>isomerase    | PDIA1_HUMAN | 256 | 61 | 57480 | 4.6 | >0.05 |
| <b>27</b> | 6.95  | 14000±<br>4800 | 2050±<br>1300 | Carboxy-<br>peptidase E               | CBPE_HUMAN  | 190 | 46 | 53516 | 4.9 | <0.05 |
| <b>28</b> | 0.46  | 3000±<br>1700  | 6400±<br>2300 | Protein<br>disulfide-<br>isomerase A3 | PDIA3_HUMAN | 145 | 46 | 57146 | 5.9 | >0.05 |
| <b>29</b> | 0.04  | 180±<br>150    | 5000±<br>4900 | Protein<br>disulfide-<br>isomerase A3 | PDIA3_HUMAN | 209 | 55 | 57146 | 5.9 | <0.05 |
| <b>30</b> | 11.52 | 1800±<br>320   | 150±<br>100   | Alpha-enolase                         | ENOA_HUMAN  | 223 | 79 | 47481 | 7.7 | <0.05 |

---



---

|           |      |                |               |                                    |             |     |    |       |     |       |
|-----------|------|----------------|---------------|------------------------------------|-------------|-----|----|-------|-----|-------|
| <b>31</b> | 2.88 | 890±<br>340    | 310±<br>170   | Cathepsin D                        | CATD_HUMAN  | 116 | 53 | 45037 | 6.1 | <0.05 |
| <b>32</b> | 7.86 | 6100±<br>1000  | 780±<br>330   | Elongation<br>factor 1-<br>gamma   | EF1G_HUMAN  | 126 | 49 | 50429 | 6.3 | <0.05 |
| <b>33</b> | 2.39 | 14000±<br>5100 | 5900±<br>1600 | Elongation<br>factor 1-<br>alpha 1 | EF1A1_HUMAN | 63  | 40 | 50451 | 9.7 | >0.05 |
| <b>34</b> | 0.25 | 1700±<br>1300  | 6900±<br>3000 | Serpin B5                          | SPB5_HUMAN  | 93  | 60 | 42530 | 5.7 | <0.05 |
| <b>35</b> | 0.09 | 320±<br>160    | 3600±<br>1600 | Serpin B5                          | SPB5_HUMAN  | 124 | 59 | 42530 | 5.7 | >0.05 |

---

---

|           |       |                |              |                                                            |             |     |    |              |     |       |
|-----------|-------|----------------|--------------|------------------------------------------------------------|-------------|-----|----|--------------|-----|-------|
| <b>36</b> | 0.15  | 270<br>190     | 1800±<br>820 | Cathepsin B                                                | CATB_HUMAN  | 69  | 39 | 38766        | 5.9 | <0.05 |
| <b>37</b> | 3.31  | 1200±<br>420   | 360±<br>150  | Poly(rC)-<br>binding<br>protein 1                          | PCBP1_HUMAN | 87  | 55 | 37987        | 6.8 | <0.05 |
| <b>38</b> | 16.74 | 1600±<br>410   | 95±<br>130   | 60S acidic<br>ribosomal<br>protein P0                      | RLA0_HUMAN  | 81  | 46 | 34423        | 5.6 | <0.05 |
| <b>39</b> | 6.80  | 7600±<br>1100  | 1100±<br>660 | L-lactate<br>dehydro-<br>genase B<br>chain                 | LDHB_HUMAN  | 116 | 55 | 36900        | 5.7 | <0.05 |
| <b>40</b> | 9.45  | 10200±<br>3900 | 1100±<br>850 | Hetero-<br>geneous<br>nuclear<br>ribonucleo-<br>protein A1 | ROA1_HUMAN  | 114 | 43 | 38837.0<br>0 | 9.6 | >0.05 |

---

---

|           |      |               |                |                                   |             |     |    |       |     |       |
|-----------|------|---------------|----------------|-----------------------------------|-------------|-----|----|-------|-----|-------|
| <b>41</b> | 0.14 | 1700±<br>1300 | 12000±<br>3000 | 14-3-3 protein<br>sigma           | 1433S_HUMAN | 105 | 65 | 27871 | 4.5 | <0.05 |
| <b>42</b> | 0.21 | 1100±<br>760  | 5300±<br>1700  | Heat shock<br>protein beta-1      | HSPB1_HUMAN | 145 | 71 | 22826 | 6   | <0.05 |
| <b>43</b> | 9.66 | 6700±<br>1600 | 690±<br>450    | Peroxiredoxin-<br>6               | PRDX6_HUMAN | 123 | 64 | 25133 | 6   | <0.05 |
| <b>44</b> | 3.06 | 3600±<br>1000 | 1200±<br>320   | Triose-<br>phosphate<br>isomerase | TPIS_HUMAN  | 98  | 62 | 31057 | 5.6 | >0.05 |
| <b>45</b> | 0.25 | 860±<br>780   | 3500±<br>1600  | Glutathione S-<br>transferase P   | GSTP1_HUMAN | 137 | 69 | 23569 | 5.3 | <0.05 |

---

---

|           |       |               |              |                                                   |             |     |    |       |     |       |
|-----------|-------|---------------|--------------|---------------------------------------------------|-------------|-----|----|-------|-----|-------|
| <b>46</b> | 2.52  | 2500±<br>170  | 1000±<br>470 | Peroxiredoxin-<br>2                               | PRDX2_HUMAN | 117 | 55 | 22049 | 5.6 | >0.05 |
| <b>47</b> | 0.02  | 26±<br>13.67  | 1400±<br>540 | Superoxide<br>dismutase<br>[Mn],<br>mitochondrial | SODM_HUMAN  | 53  | 40 | 24878 | 9.1 | <0.05 |
| <b>48</b> | 2.70  | 5600±<br>940  | 2100±<br>820 | Peroxiredoxin-<br>1                               | PRDX1_HUMAN | 149 | 79 | 22324 | 9.2 | >0.05 |
| <b>49</b> | 2.08  | 1300±<br>330  | 610±<br>450  | Nucleoside<br>diphosphate<br>kinase A             | NDKA_HUMAN  | 64  | 53 | 17309 | 5.8 | >0.05 |
| <b>50</b> | 13.37 | 1300±<br>1400 | 99±<br>120   | Cofilin-1                                         | COF1_HUMAN  | 86  | 65 | 18719 | 9.1 | >0.05 |

---

---

|           |      |               |               |                                             |            |     |    |       |   |       |
|-----------|------|---------------|---------------|---------------------------------------------|------------|-----|----|-------|---|-------|
| <b>51</b> | 0.09 | 170±<br>150   | 1800±<br>800  | Peptidyl-prolyl<br>cis-trans<br>isomerase A | PPIA_HUMAN | 58  | 39 | 18229 | 9 | <0.05 |
| <b>52</b> | 2.02 | 1800±<br>2000 | 890±<br>500   | Peptidyl-prolyl<br>cis-trans<br>isomerase A | PPIA_HUMAN | 78  | 53 | 18229 | 9 | >0.05 |
| <b>53</b> | 0.31 | 2300±<br>2400 | 7200±<br>1400 | Peptidyl-prolyl<br>cis-trans<br>isomerase A | PPIA_HUMAN | 116 | 70 | 18229 | 9 | >0.05 |

---

**S6 Table: Comparisons of differentially expressed proteins between individual comparisons in each cancer cell line vs HCK1T**

| <b>Comparison</b>                                  | <b>Number of common proteins between individual comparisons</b> | <b>Entry names</b> | <b>Protein names</b>                          |
|----------------------------------------------------|-----------------------------------------------------------------|--------------------|-----------------------------------------------|
| <b>SiHa vs HCK1T, HeLa vs HCK1T, C33A vs HCK1T</b> | 16                                                              | PPIA_HUMAN         | Peptidyl-prolyl cis-trans isomerase A         |
|                                                    |                                                                 | ENOA_HUMAN         | Alpha-enolase                                 |
|                                                    |                                                                 | GLU2B_HUMAN        | Glucosidase 2 subunit beta                    |
|                                                    |                                                                 | HSPB1_HUMAN        | Heat shock protein beta-1                     |
|                                                    |                                                                 | TPIS_HUMAN         | Triosephosphate isomerase                     |
|                                                    |                                                                 | PDIA1_HUMAN        | Protein disulfide-isomerase                   |
|                                                    |                                                                 | KPYM_HUMAN         | Pyruvate kinase PKM                           |
|                                                    |                                                                 | NUCB1_HUMAN        | Nucleobindin-1                                |
|                                                    |                                                                 | PCSK9_HUMAN        | Proprotein convertase subtilisin/kexin type 9 |
|                                                    |                                                                 | GRP78_HUMAN        | 78 kDa glucose-regulated protein              |
|                                                    |                                                                 | TPP1_HUMAN         | Tripeptidyl-peptidase 1                       |
|                                                    |                                                                 | HSP7C_HUMAN        |                                               |
|                                                    |                                                                 | CBPE_HUMAN         |                                               |
|                                                    |                                                                 | CATD_HUMAN         |                                               |
|                                                    |                                                                 | HSP71_HUMAN        |                                               |
|                                                    |                                                                 | CALR_HUMAN         |                                               |

---

|                                             |    |             |                                                              |
|---------------------------------------------|----|-------------|--------------------------------------------------------------|
| <b>SiHa vs<br/>HCK1T, HeLa<br/>vs HCK1T</b> | 14 | PLOD2_HUMAN | Procollagen-lysine,2-oxoglutarate 5-<br>dioxygenase 2        |
|                                             |    | GELS_HUMAN  | Gelsolin                                                     |
|                                             |    | K1C10_HUMAN | Keratin, type I cytoskeletal 10                              |
|                                             |    | FSTL4_HUMAN | Follistatin-related protein 4                                |
|                                             |    | GANAB_HUMAN | Neutral alpha-glucosidase AB                                 |
|                                             |    | TIMP2_HUMAN | Metalloproteinase inhibitor 2                                |
|                                             |    | ACTB_HUMAN  | Actin, cytoplasmic 1                                         |
|                                             |    | 1A24_HUMAN  | HLA class I histocompatibility antigen, A-<br>24 alpha chain |
|                                             |    | ACTG_HUMAN  | Actin, cytoplasmic 2                                         |
|                                             |    | PGAM1_HUMAN | Phosphoglycerate mutase 1                                    |
|                                             |    | ALDOA_HUMAN | Fructose-bisphosphate aldolase A                             |
|                                             |    | C1R_HUMAN   | Complement C1r subcomponent                                  |
|                                             |    | K2C1_HUMAN  | Keratin, type II cytoskeletal 1                              |
|                                             |    | TIMP1_HUMAN | Metalloproteinase inhibitor 1                                |

---

---

|                                             |   |             |                                            |
|---------------------------------------------|---|-------------|--------------------------------------------|
| <b>SiHa vs<br/>HCK1T, C33A<br/>vs HCK1T</b> | 6 | GSTP1_HUMAN | Glutathione S-transferase P                |
|                                             |   | SPB5_HUMAN  | Serpin B5                                  |
|                                             |   | CATB_HUMAN  | Cathepsin B                                |
|                                             |   | 1433S_HUMAN | 14-3-3 protein sigma                       |
|                                             |   | SODM_HUMAN  | Superoxide dismutase [Mn], mitochondrial   |
|                                             |   | PDIA3_HUMAN | Protein disulfide-isomerase A3             |
| <b>HeLa vs<br/>HCK1T, C33A<br/>vs HCK1T</b> | 6 | LAMC2_HUMAN | Laminin subunit gamma-2                    |
|                                             |   | ROA1_HUMAN  | Heterogeneous nuclear ribonucleoprotein A1 |
|                                             |   | HS90B_HUMAN | Heat shock protein HSP 90-beta             |
|                                             |   | TCPQ_HUMAN  | T-complex protein 1 subunit theta          |
|                                             |   | STIP1_HUMAN | Stress-induced-phosphoprotein 1            |
|                                             |   | TKT_HUMAN   | Transketolase                              |

---



| <b>Comparison</b>    | <b>Number of unique proteins in individual comparisons</b> | <b>Entry names</b> | <b>Protein names</b>                                  |
|----------------------|------------------------------------------------------------|--------------------|-------------------------------------------------------|
| <b>SiHa vs HCK1T</b> | 4                                                          | TAGL2_HUMAN        | Transgelin-2                                          |
|                      |                                                            | G3P_HUMAN          | Glyceraldehyde-3-phosphate dehydrogenase              |
|                      |                                                            | NPC2_HUMAN         | Epididymal secretory protein E1                       |
|                      |                                                            | GDIR1_HUMAN        | Rho GDP-dissociation inhibitor 1                      |
| <b>HeLa vs HCK1T</b> | 8                                                          | FSCN1_HUMAN        | Fascin                                                |
|                      |                                                            | DPP2_HUMAN         | Dipeptidyl peptidase 2                                |
|                      |                                                            | PDIA6_HUMAN        | Protein disulfide-isomerase A6                        |
|                      |                                                            | BGH3_HUMAN         | Transforming growth factor-beta-induced protein ig-h3 |
|                      |                                                            | ATPB_HUMAN         | ATP synthase subunit beta, mitochondrial              |
|                      |                                                            | PARK7_HUMAN        | Protein deglycase DJ-1                                |
|                      |                                                            | CATZ_HUMAN         | Cathepsin Z                                           |
|                      |                                                            | PGK1_HUMAN         | Phosphoglycerate kinase 1                             |

|                          |    |             |                                           |
|--------------------------|----|-------------|-------------------------------------------|
| <b>C33A vs<br/>HCK1T</b> | 13 | PCBP1_HUMAN | Poly(rC)-binding protein 1                |
|                          |    | COF1_HUMAN  | Cofilin-1                                 |
|                          |    | TERA_HUMAN  | Transitional endoplasmic reticulum ATPase |
|                          |    | EF1G_HUMAN  | Elongation factor 1-gamma                 |
|                          |    | EF1A1_HUMAN | Elongation factor 1-alpha 1               |
|                          |    | PRDX1_HUMAN | Peroxiredoxin-1                           |
|                          |    | HSP74_HUMAN | Heat shock 70 kDa protein 4               |
|                          |    | FINC_HUMAN  | Fibronectin                               |
|                          |    | LDHB_HUMAN  | L-lactate dehydrogenase B chain           |
|                          |    | PRDX6_HUMAN | Peroxiredoxin-6                           |
|                          |    | RLA0_HUMAN  | 60S acidic ribosomal protein P0           |
|                          |    | NDKA_HUMAN  | Nucleoside diphosphate kinase A           |
|                          |    | PRDX2_HUMAN | Peroxiredoxin-2                           |

---

**S7 Table. Molecular function of differentially expressed proteins**

---

| <b>Entry name</b>  | <b>Protein name</b>                                               | <b>Molecular function</b>             |
|--------------------|-------------------------------------------------------------------|---------------------------------------|
| <b>1433S_HUMAN</b> | 14-3-3 protein<br>sigma                                           | binding, enzyme regulator<br>activity |
| <b>1A24_HUMAN</b>  | HLA class I<br>histocompatibility<br>antigen, A-24<br>alpha chain | receptor activity                     |
| <b>ACTB_HUMAN</b>  | Actin, cytoplasmic<br>1                                           | structural molecule activity          |
| <b>ACTG_HUMAN</b>  | Actin, cytoplasmic<br>2                                           | structural molecule activity          |
| <b>ALDOA_HUMAN</b> | Fructose-<br>bisphosphate<br>aldolase A                           | binding, catalytic                    |
| <b>C1R_HUMAN</b>   | Complement C1r<br>subcomponent                                    | binding, catalytic                    |
| <b>CALR_HUMAN</b>  | Calreticulin                                                      | binding                               |
| <b>CATB_HUMAN</b>  | Cathepsin B                                                       | catalytic                             |
| <b>CATD_HUMAN</b>  | Cathepsin D                                                       | catalytic                             |
| <b>CBPE_HUMAN</b>  | Carboxypeptidase<br>E                                             | catalytic                             |

---

---

|                    |                                          |                                               |
|--------------------|------------------------------------------|-----------------------------------------------|
| <b>ENO4_HUMAN</b>  | Alpha-enolase                            | catalytic                                     |
| <b>FSTL4_HUMAN</b> | Follistatin-related protein 4            | binding                                       |
| <b>G3P_HUMAN</b>   | Glyceraldehyde-3-phosphate dehydrogenase | catalytic                                     |
| <b>GANAB_HUMAN</b> | Neutral alpha-glucosidase AB             | catalytic                                     |
| <b>GDIR1_HUMAN</b> | Rho GDP-dissociation inhibitor 1         | binding, catalytic, enzyme regulator activity |
| <b>GELS_HUMAN</b>  | Gelsolin                                 | binding, structural molecule activity         |
| <b>GLU2B_HUMAN</b> | Glucosidase 2 subunit beta               | binding, catalytic, enzyme regulator activity |
| <b>GRP78_HUMAN</b> | 78 kDa glucose-regulated protein         | binding,catalytic                             |
| <b>GSTP1_HUMAN</b> | Glutathione S-transferase P              | binding,catalytic                             |
| <b>HS71A_HUMAN</b> | Heat shock 70 kDa protein 1A             | binding, catalytic                            |

---

---

|                    |                                               |                              |
|--------------------|-----------------------------------------------|------------------------------|
| <b>HSP7C_HUMAN</b> | Heat shock cognate 71 kDa protein             | binding, catalytic           |
| <b>HSPB1_HUMAN</b> | Heat shock protein beta-1                     | structural molecule activity |
| <b>K1C10_HUMAN</b> | Keratin, type I cytoskeletal 10               | structural molecule activity |
| <b>K2C1_HUMAN</b>  | Keratin, type II cytoskeletal 1               | structural molecule activity |
| <b>KPYM_HUMAN</b>  | Pyruvate kinase PKM                           | binding, catalytic           |
| <b>NPC2_HUMAN</b>  | Epididymal secretory protein E1               | binding                      |
| <b>NUCB1_HUMAN</b> | Nucleobindin-1                                | binding                      |
| <b>PCSK9_HUMAN</b> | Proprotein convertase subtilisin/kexin type 9 | catalytic                    |
| <b>PDIA1_HUMAN</b> | Protein disulfide-isomerase                   | catalytic                    |
| <b>PDIA3_HUMAN</b> | Protein disulfide-isomerase A3                | catalytic                    |

---

---

|                    |                                                    |                                               |
|--------------------|----------------------------------------------------|-----------------------------------------------|
| <b>PGAM1_HUMAN</b> | Phosphoglycerate mutase 1                          | binding, catalytic                            |
| <b>PLOD2_HUMAN</b> | Procollagen-lysine, 2-oxoglutarate 5-dioxygenase 2 | catalytic                                     |
| <b>PPIA_HUMAN</b>  | Peptidyl-prolyl cis-trans isomerase A              | catalytic                                     |
| <b>SODM_HUMAN</b>  | Superoxide dismutase [Mn], mitochondrial           | catalytic                                     |
| <b>SPB5_HUMAN</b>  | Serpin B5                                          | catalytic, enzyme regulator activity          |
| <b>TAGL2_HUMAN</b> | Transgelin-2                                       | binding, structural molecule activity         |
| <b>TIMP1_HUMAN</b> | Metalloproteinase inhibitor 1                      | binding, catalytic, enzyme regulator activity |
| <b>TIMP2_HUMAN</b> | Metalloproteinase inhibitor 2                      | binding, catalytic, enzyme regulator activity |
| <b>TPIS_HUMAN</b>  | Triosephosphate isomerase                          | catalytic                                     |
| <b>TPP1_HUMAN</b>  | Tripeptidyl-peptidase 1                            | catalytic                                     |

---

---

|                    |                                                       |                                                                         |
|--------------------|-------------------------------------------------------|-------------------------------------------------------------------------|
| <b>ATPB_HUMAN</b>  | ATP synthase subunit beta, mitochondrial              | binding, catalytic, receptor activity, transporter activity             |
| <b>BGH3_HUMAN</b>  | Transforming growth factor-beta-induced protein ig-h3 | binding                                                                 |
| <b>CATZ_HUMAN</b>  | Cathepsin Z                                           | catalytic                                                               |
| <b>DPP2_HUMAN</b>  | Dipeptidyl peptidase 2                                | catalytic                                                               |
| <b>FSCN1_HUMAN</b> | Fascin                                                | binding , structural molecule activity                                  |
| <b>HS90B_HUMAN</b> | Heat shock protein HSP 90-beta                        | binding                                                                 |
| <b>LAMC2_HUMAN</b> | Laminin subunit gamma-2                               | receptor activity                                                       |
| <b>PARK7_HUMAN</b> | Protein deglycase DJ-1                                | binding, catalytic, nucleid acid binding, transcription factor activity |
| <b>PDIA6_HUMAN</b> | Protein disulfide-isomerase A6                        | catalytic                                                               |
| <b>PGK1_HUMAN</b>  | Phosphoglycerate kinase 1                             | catalytic                                                               |

---

---

|                    |                                            |                                                                                  |
|--------------------|--------------------------------------------|----------------------------------------------------------------------------------|
| <b>ROA1_HUMAN</b>  | Heterogeneous nuclear ribonucleoprotein A1 | Binding, catalytic, structural molecule activity                                 |
| <b>STIP1_HUMAN</b> | Stress-induced-phosphoprotein 1            | binding                                                                          |
| <b>TCPQ_HUMAN</b>  | T-complex protein 1 subunit theta          | binding, catalytic                                                               |
| <b>TKT_HUMAN</b>   | Transketolase                              | catalytic                                                                        |
| <b>COF1_HUMAN</b>  | Cofilin-1                                  | binding                                                                          |
| <b>EF1A1_HUMAN</b> | Elongation factor 1-alpha 1                | binding, catalytic, translation regulator activity                               |
| <b>EF1G_HUMAN</b>  | Elongation factor 1-gamma                  | binding, catalytic, structural molecule activity, translation regulator activity |
| <b>FINC_HUMAN</b>  | Fibronectin                                | binding                                                                          |
| <b>HSP74_HUMAN</b> | Heat shock 70 kDa protein 4                | binding                                                                          |
| <b>LDHB_HUMAN</b>  | L-lactate dehydrogenase B chain            | catalytic                                                                        |

---



---

|                    |                                           |                                       |
|--------------------|-------------------------------------------|---------------------------------------|
| <b>NDKA_HUMAN</b>  | Nucleoside diphosphate kinase A           | catalytic                             |
| <b>PCBP1_HUMAN</b> | Poly(rC)-binding protein 1                | binding, catalytic                    |
| <b>PRDX1_HUMAN</b> | Peroxiredoxin-1                           | catalytic, antioxidant                |
| <b>PRDX2_HUMAN</b> | Peroxiredoxin-2                           | catalytic, antioxidant                |
| <b>PRDX6_HUMAN</b> | Peroxiredoxin-6                           | catalytic, antioxidant                |
| <b>RLA0_HUMAN</b>  | 60S acidic ribosomal protein P0           | binding, structural molecule activity |
| <b>TERA_HUMAN</b>  | Transitional endoplasmic reticulum ATPase | binding,catalytic                     |

---

**S8 Table. Differentially expressed proteins used in IPA**

| <b>Protein name</b>                             | <b>Entry name</b> | <b>Gene name</b> | <b>Fold change</b> |
|-------------------------------------------------|-------------------|------------------|--------------------|
| <b>Actin, cytoplasmic 1</b>                     | ACTB_HUMAN        | ACTB             | -4.17              |
| <b>Actin, cytoplasmic 2</b>                     | ACTG_HUMAN        | ACTG1            | -4.17              |
| <b>Fructose-bisphosphate aldolase A</b>         | ALDOA_HUMAN       | ALDOA            | -3.92              |
| <b>Rho GDP-dissociation inhibitor 1</b>         | GDIR1_HUMAN       | ARHGDI1          | -6.67              |
| <b>ATP synthase subunit beta, mitochondrial</b> | ATPB_HUMAN        | ATP5B            | -4.00              |
| <b>Complement C1r subcomponent</b>              | C1R_HUMAN         | C1R              | 5.74               |
| <b>Calreticulin</b>                             | CALR_HUMAN        | CALR             | -8.11              |
| <b>T-complex protein 1 subunit theta</b>        | TCPQ_HUMAN        | CCT8             | 6.53               |
| <b>Cofilin-1</b>                                | COF1_HUMAN        | CFL1             | 13.37              |
| <b>Carboxypeptidase E</b>                       | CBPE_HUMAN        | CPE              | 7.25               |
| <b>Cathepsin B</b>                              | CATB_HUMAN        | CTSB             | -5.26              |
| <b>Cathepsin D</b>                              | CATD_HUMAN        | CTSD             | 7.99               |
| <b>Cathepsin Z</b>                              | CATZ_HUMAN        | CTSZ             | 2.21               |

|                                                                 |             |          |       |
|-----------------------------------------------------------------|-------------|----------|-------|
| <b>Dipeptidyl peptidase 2</b>                                   | DPP2_HUMAN  | DPP7     | 2.21  |
| <b>Elongation factor 1-alpha 1</b>                              | EF1A1_HUMAN | EEF1A1   | 2.39  |
| <b>Elongation factor 1-gamma</b>                                | EF1G_HUMAN  | EEF1G    | 7.86  |
| <b>Alpha-enolase</b>                                            | ENOA_HUMAN  | ENO1     | -2.86 |
| <b>Fibronectin</b>                                              | FINC_HUMAN  | FN1      | -4.37 |
| <b>Fascin</b>                                                   | FSCN1_HUMAN | FSCN1    | 2.54  |
| <b>Follistatin-related protein 4</b>                            | FSTL4_HUMAN | FSTL4    | 7.90  |
| <b>Neutral alpha-glucosidase AB</b>                             | GANAB_HUMAN | GANAB    | 7.90  |
| <b>Glyceraldehyde-3-phosphate dehydrogenase</b>                 | G3P_HUMAN   | GAPDH    | -2.22 |
| <b>Gelsolin</b>                                                 | GELS_HUMAN  | GSN      | 7.56  |
| <b>Glutathione S-transferase P</b>                              | GSTP1_HUMAN | GSTP1    | -3.92 |
| <b>HLA class I histocompatibility antigen, A-24 alpha chain</b> | 1A24_HUMAN  | HLA-A    | 12.66 |
| <b>Heterogeneous nuclear ribonucleoprotein A1</b>               | ROA1_HUMAN  | HNRNPA1  | 6.79  |
| <b>Heat shock protein HSP 90-beta</b>                           | HS90B_HUMAN | HSP90AB1 | 13.68 |
| <b>Heat shock 70 kDa protein 1B</b>                             | HS71B_HUMAN | HSPA1B   | 5.51  |
| <b>Heat shock 70 kDa protein 4</b>                              | HSP74_HUMAN | HSPA4    | 5.15  |

|                                          |             |       |       |
|------------------------------------------|-------------|-------|-------|
| <b>78 kDa glucose-regulated protein</b>  | GRP78_HUMAN | HSPA5 | -3.33 |
| <b>Heat shock cognate 71 kDa protein</b> | HSP7C_HUMAN | HSPA8 | 3.49  |
| <b>Heat shock protein beta-1</b>         | HSPB1_HUMAN | HSPB1 | -8.11 |
| <b>Keratin, type II cytoskeletal 1</b>   | K2C1_HUMAN  | KRT1  | 6.06  |
| <b>Keratin, type I cytoskeletal 10</b>   | K1C10_HUMAN | KRT10 | 8.02  |
| <b>Laminin subunit gamma-2</b>           | LAMC2_HUMAN | LAMC2 | -2.30 |
| <b>L-lactate dehydrogenase B chain</b>   | LDHB_HUMAN  | LDHB  | 6.80  |
| <b>Nucleoside diphosphate kinase A</b>   | NDKA_HUMAN  | NME1  | 2.08  |
| <b>Epididymal secretory protein E1</b>   | NPC2_HUMAN  | NPC2  | 21.56 |
| <b>Nucleobindin-1</b>                    | NUCB1_HUMAN | NUCB1 | 12.54 |
| <b>Protein disulfide-isomerase</b>       | PDIA1_HUMAN | P4HB  | -3.06 |
| <b>Protein deglycase DJ-1</b>            | PARK7_HUMAN | PARK7 | -9.09 |
| <b>Poly(rC)-binding protein 1</b>        | PCBP1_HUMAN | PCBP1 | 3.31  |

|                                                           |             |          |        |
|-----------------------------------------------------------|-------------|----------|--------|
| <b>Proprotein convertase subtilisin/kexin type 9</b>      | PCSK9_HUMAN | PCSK9    | 17.10  |
| <b>Protein disulfide-isomerase A3</b>                     | PDIA3_HUMAN | PDIA3    | -4.21  |
| <b>Protein disulfide-isomerase A6</b>                     | PDIA6_HUMAN | PDIA6    | -4.00  |
| <b>Phosphoglycerate mutase 1</b>                          | PGAM1_HUMAN | PGAM1    | 3.64   |
| <b>Phosphoglycerate kinase 1</b>                          | PGK1_HUMAN  | PGK1     | 2.37   |
| <b>Pyruvate kinase PKM</b>                                | KPYM_HUMAN  | PKM      | 3.07   |
| <b>Procollagen-lysine, 2-oxoglutarate 5-dioxygenase 2</b> | PLOD2_HUMAN | PLOD2    | 7.90   |
| <b>Peroxiredoxin-1</b>                                    | PRDX1_HUMAN | PRDX1    | 2.70   |
| <b>Peroxiredoxin-2</b>                                    | PRDX2_HUMAN | PRDX2    | 2.52   |
| <b>Peroxiredoxin-6</b>                                    | PRDX6_HUMAN | PRDX6    | 9.66   |
| <b>Glucosidase 2 subunit beta</b>                         | GLU2B_HUMAN | PRKCSH   | -2.83  |
| <b>60S acidic ribosomal protein P0</b>                    | RLA0_HUMAN  | RPLP0    | 16.74  |
| <b>Serpin B5</b>                                          | SPB5_HUMAN  | SERPINB5 | -3.88  |
| <b>14-3-3 protein sigma</b>                               | 1433S_HUMAN | SFN      | -13.33 |
| <b>Superoxide dismutase [Mn], mitochondrial</b>           | SODM_HUMAN  | SOD2     | -11.11 |

|                                                              |             |        |       |
|--------------------------------------------------------------|-------------|--------|-------|
| <b>Stress-induced-phosphoprotein 1</b>                       | STIP1_HUMAN | STIP1  | 6.99  |
| <b>Transgelin-2</b>                                          | TAGL2_HUMAN | TAGLN2 | -2.22 |
| <b>Transforming growth factor-beta-induced protein ig-h3</b> | BGH3_HUMAN  | TGFBI  | 45.15 |
| <b>Metalloproteinase inhibitor 1</b>                         | TIMP1_HUMAN | TIMP1  | 9.58  |
| <b>Metalloproteinase inhibitor 2</b>                         | TIMP2_HUMAN | TIMP2  | 9.33  |
| <b>Transketolase</b>                                         | TKT_HUMAN   | TKT    | 6.49  |
| <b>Triosephosphate isomerase</b>                             | TPIS_HUMAN  | TPI1   | -2.52 |
| <b>Tripeptidyl-peptidase 1</b>                               | TPP1_HUMAN  | TPP1   | 5.51  |
| <b>Transitional endoplasmic reticulum ATPase</b>             | TERA_HUMAN  | VCP    | 2.21  |

**S9 Table. IPA results for transcription factors in cancer vs normal**

| <b>Transcription Factor</b> | <b>Activation z-score</b> | <b>p value of overlap</b> | <b>Target molecules in dataset</b>                                                                                                                             |
|-----------------------------|---------------------------|---------------------------|----------------------------------------------------------------------------------------------------------------------------------------------------------------|
| <b>TP53</b>                 | -1.792                    | $2.5 \times 10^{-15}$     | ACTB,CTSB,CTSD,FN1,GAPDH,GSN,GSTP1,HSP90AB1,HSPA1A/HSPA1B,HSPA8,HSPB1,NME1,P4HB,PARK7,PDIA6,PLOD2,PRDX2,PRDX6,SERPINB5,SFN,SOD2,STIP1,TAGLN2,TGFBI,TIMP2,TPP1, |
| <b>MYC</b>                  | 0.769                     | $2.74 \times 10^{-15}$    | ACTB,ALDOA,CTSB,CTSD,ENO1,FN1,GAPDH,HLA-A,HNRNPA1,HSPB1,LDHB,NME1,NUCB1,PGAM1,PGK1,PKM,PRDX2,SOD2,TAGLN2,TIMP1,TIMP2,TKT,TPI1,                                 |
| <b>MYCN</b>                 | 0.428                     | $7.23 \times 10^{-15}$    | ACTB,ACTG1,ALDOA,EEF1A1,EEF1G,FN1,GAPDH,HLA-A,HSP90AB1,NME1,NUCB1,RPLP0,TIMP2,TPI1,                                                                            |
| <b>NFE2L2</b>               | 0.033                     | $3.11 \times 10^{-13}$    | ACTG1,ALDOA,CTSD,FN1,GSTP1,HSP90AB1,PCBP1,PDIA3,PDIA6,PRDX1,RPLP0,SOD2,STIP1,TPI1,VCP                                                                          |

---

**S10 Table. Additional number of transcription factors that regulate NRF2 targets**

---

| <b>Targets</b>  | <b>Number of TFs</b> |
|-----------------|----------------------|
| <b>ACTG1</b>    | 5                    |
| <b>ALDOA</b>    | 5                    |
| <b>CTSD</b>     | 18                   |
| <b>FN1</b>      | 44                   |
| <b>GSTP1</b>    | 12                   |
| <b>HSP90AB1</b> | 6                    |
| <b>PCBP1</b>    | 1                    |
| <b>PDIA3</b>    | 2                    |
| <b>PDIA6</b>    | 3                    |
| <b>PRDX1</b>    | 6                    |
| <b>RPLP0</b>    | 7                    |
| <b>SOD2</b>     | 28                   |
| <b>STIP1</b>    | 4                    |
| <b>TPI1</b>     | 7                    |
| <b>VCP</b>      | 3                    |

---



---

## Figure Legends

**S1 Fig.** Molecular function analysis of differentially expressed proteins identified in the secretome of cancer cell lines compared to HCK1T, as predicted by Panther Classification System (<http://www.pantherdb.org/>). Sixty-seven proteins were found to be differentially expressed in all three cancer cell lines vs HCK1T, and were classified according to their molecular function. The majority of proteins displayed catalytic activity (41.6%), while 32.4% displayed binding activity and 11.1% structural molecule activity.

**S2 Fig.** Molecular function analysis of differentially expressed proteins identified in the secretome of each cancer cell line compared to HCK1T, as predicted by Panther Classification System (<http://www.pantherdb.org/>). (A) SiHa vs HCK1T, (B) HeLa vs HCK1T and (C) C33A vs HCK1T. The proteins were classified according to their molecular function. The majority of proteins display catalytic and binding activity, followed by structural molecule activity.

**S3 Fig.** Representative SDS PAGE gel confirming the equal loading of the secretome samples used for Western blot analysis. Ten  $\mu$ g of secretome of each cell line was loaded and analyzed in precast gradient (4-12%) gels.

**S4 Fig.** Western blot analysis for tubulin in cell lysates and their corresponding secretomes, providing proof that peroxiredoxin-2 is genuinely secreted and is not a product of cell lysis. Cells were incubated with SFM (Serum-Free Medium) for 24 h after which CM (conditioned medium) was collected. The intensity of tubulin (a marker of intracellular protein contamination of secretome due to extensive cell lysis) in secretome samples deriving from cells incubated with SFM is negligible compared to the corresponding total cell extracts. Representative images of two biological replicates are presented.

**S5 Fig.** Validation of proteomics and bioinformatics results by Western blot analysis. Western blot analysis for NRF2 target indicated in Fig.4A (HSP90AB1) was performed in C33A vs HCK1T, where the upregulation level of NRF2 was higher. Panels A and B represent Western blots for HSP90AB1 in total cell extract and secretome respectively. Representative images of two biological replicates are shown for each cell line. (A) A protein band of 90 kDa corresponding to HSP90AB1 was detected. Immunoblotting for  $\alpha$ -tubulin (50 kDa) was applied to ensure equal loading of proteins in each lane. Fold expression of HSP90AB1 was assessed relative to HCK1T. The mean HSP90AB1 value for C33A was  $2.3 \pm 0.2$  ( $p < 0.05$ ) compared to HCK1T. (B) A protein band of 90 kDa corresponding to HSP90AB1 was detected. Fold expression of HSP90AB1 was assessed relative to HCK1T. The mean HSP90AB1 value for C33A was  $4.8 \pm 1.1$  ( $p < 0.05$ ) compared to HCK1T. Graphical representation of densitometry analysis of the results (mean  $\pm$  SD), is also shown (\*  $p < 0.05$ , Student's *t*-test).

S1 Fig.

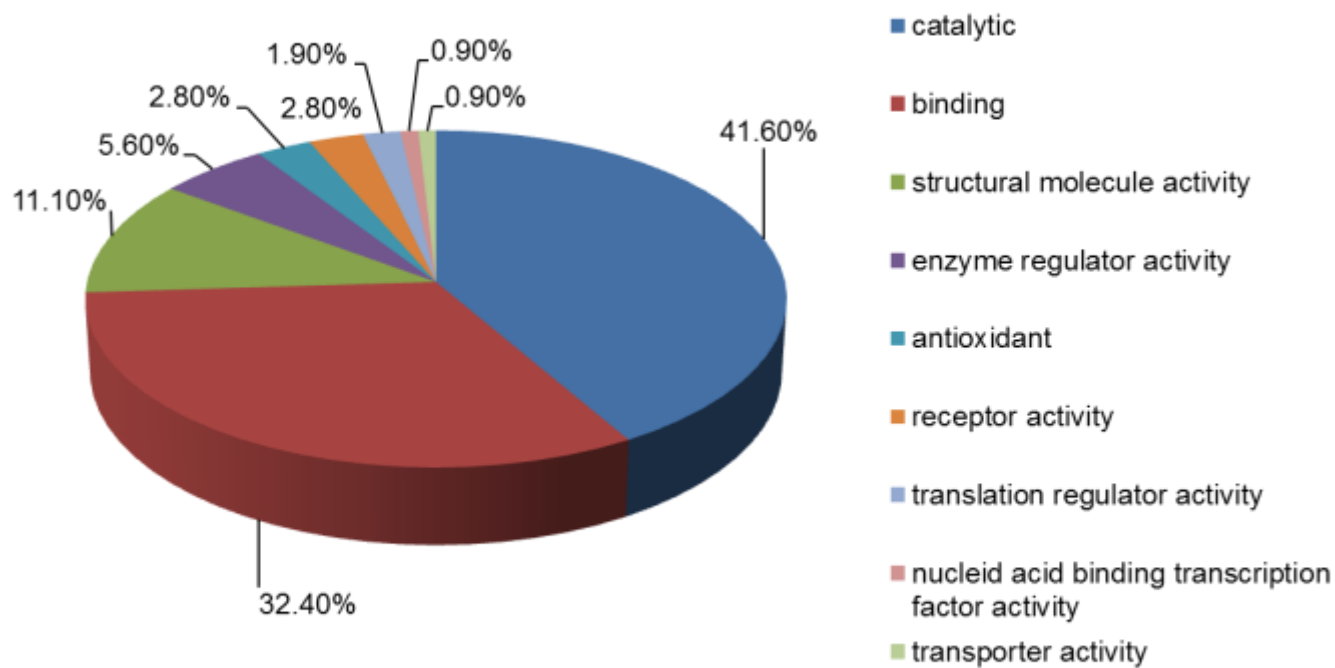

S2 Fig.

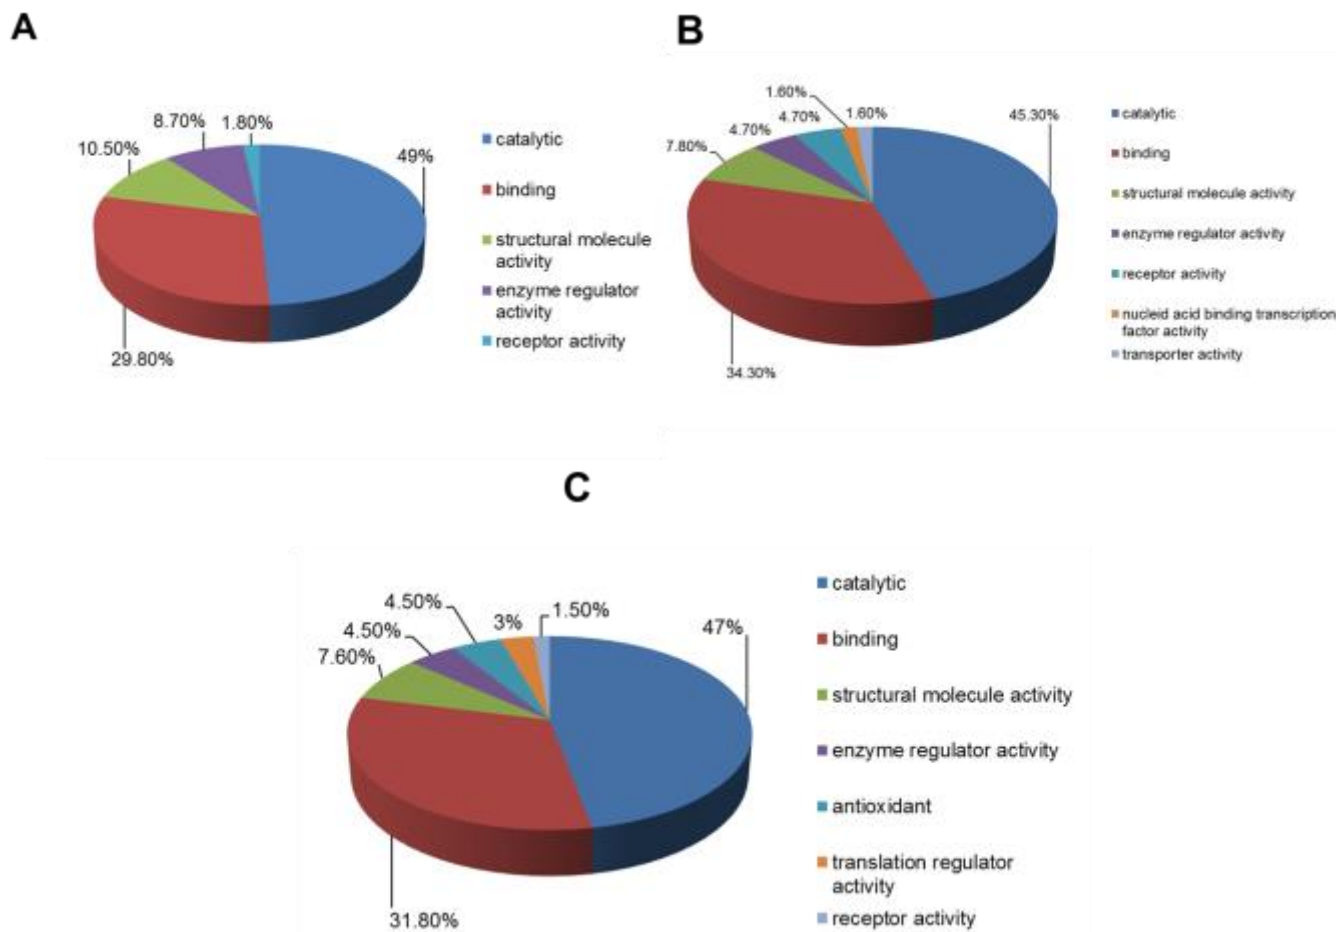

S3 Fig.

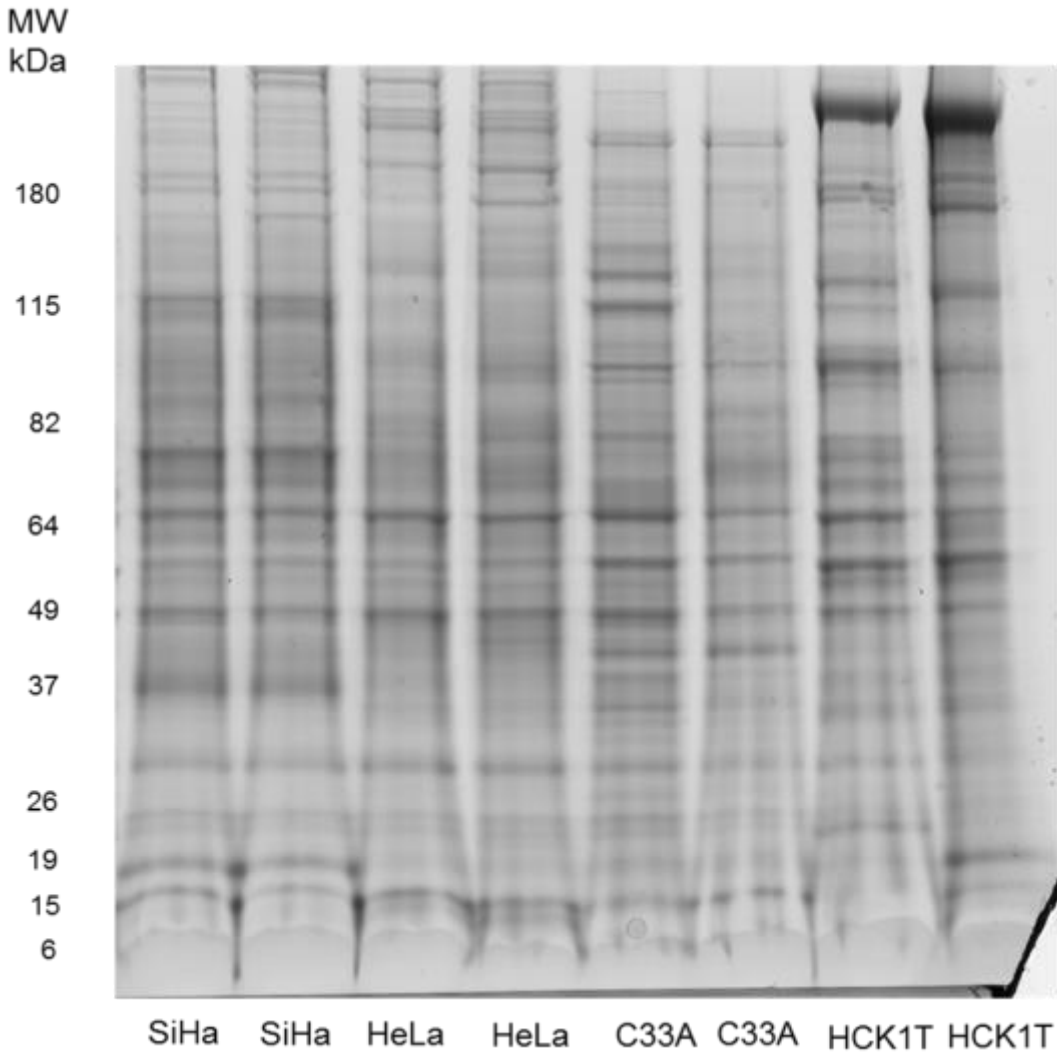

S4 Fig.

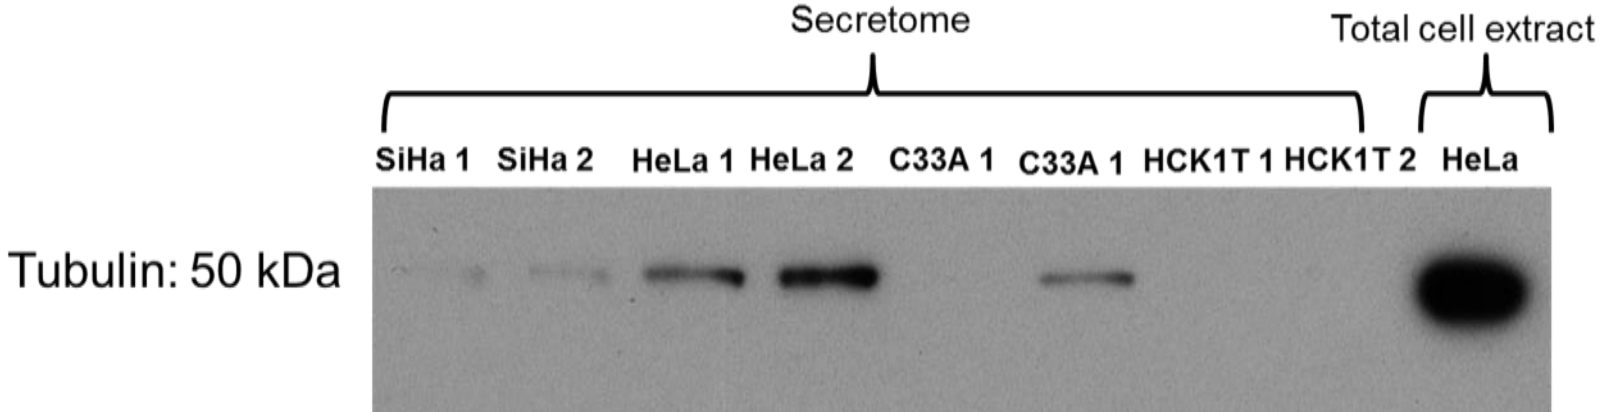

S5 Fig.

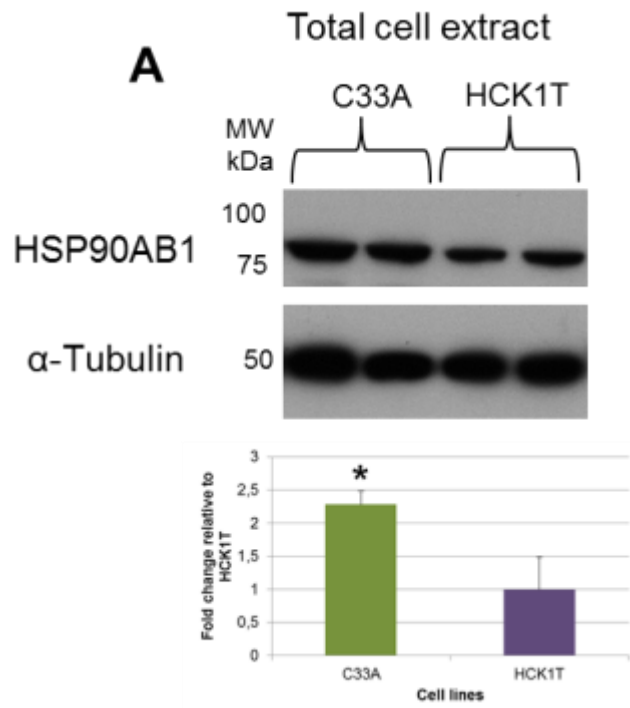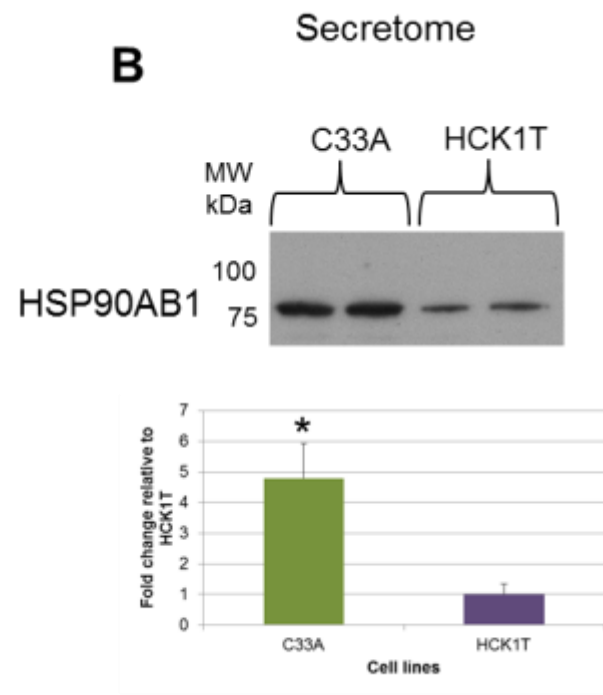

Supplement: f1 [file 4180703.f1.pdf]
